# Supplementary material for: Treatment of Multidrug-Resistant Leukemia Cells by Novel Artemisinin-, Egonol-, and Thymoquinone-Derived Hybrid Compounds
Source: PubMed Central journal article supplement (PMC6017613; doi:10.3390/molecules23040841), 2018-04-06
Supplement: molecules-23-00841-s001.pdf [file molecules-23-00841-s001.pdf]

## Supporting Information

### Treatment of Multidrug-Resistant Leukemia Cells by Novel Artemisinin-, Egonol-, and Thymoquinone-Derived Hybrid Compounds

Lisa Gruber<sup>1</sup>, Sara Abdelfatah<sup>1</sup>, Tony Fröhlich<sup>2</sup>, Christoph Reiter<sup>2</sup>, Volker Klein<sup>2</sup>, Svetlana B. Tsogoeva<sup>2</sup>, Thomas Efferth<sup>1\*</sup>

<sup>1</sup> Department of Pharmaceutical Biology, Institute of Pharmacy and Biochemistry, Johannes Gutenberg University, Mainz, Germany

<sup>2</sup> Department of Chemistry and Pharmacy, Organic Chemistry Chair I and Interdisciplinary Center for Molecular Materials (ICMM), University of Erlangen-Nuremberg, Erlangen, Germany

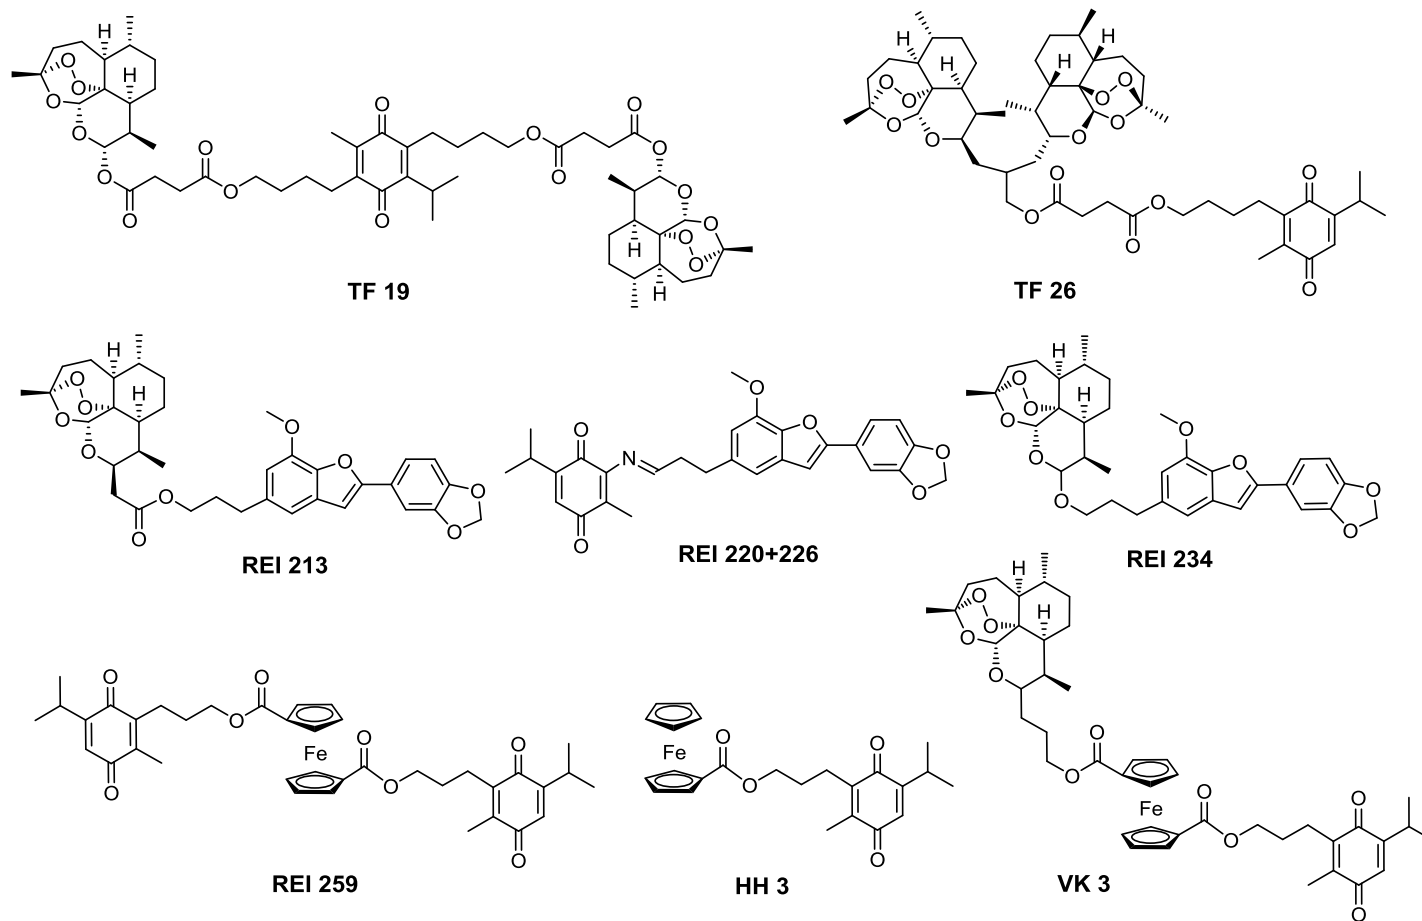

**Figure S1:** Chemical structures of new artemisinin-based hybrids, dimers and trimers studied in this work.

## Purity Data

**TF 19:** MS (ESI):  $m/z = 1064$   $[M+Na]^+$ . HRMS (ESI):  $m/z$  calcd. for  $[C_{56}H_{80}NaO_{18}]^+$ : 1063.5237, found: 1063.5244. Anal. calcd. for  $C_{56}H_{80}O_{18}$ : C, 64.60; H, 7.74; Found: C, 64.58; H, 7.84.

**TF 26:** MS (ESI):  $m/z = 948$   $[M+Na]^+$ . HRMS (ESI):  $m/z$  calcd. for  $[C_{52}H_{76}NaO_{14}]^+$ : 947.5127, found: 947.5151. Anal. calcd. for  $C_{52}H_{76}O_{14}$ : C, 67.51; H, 8.28; Found: C, 67.34; H, 8.34.

**REI 213:** MS (ESI):  $m/z = 657$   $[M+Na]^+$ . HRMS (ESI):  $m/z$  calcd. for  $[C_{36}H_{42}NaO_{10}]^+$  657.2670, found 657.2682. Anal. calcd. for  $C_{36}H_{42}O_{10}$ : C, 68.12; H, 6.67; Found: C, 68.20; H, 7.02.

**REI 220+226:** MS (MALDI-TOF, without matrix):  $m/z = 485$   $[M]^+$ . HRMS (ESI):  $m/z$  calcd. for  $[C_{29}H_{28}NO_6]^+$  486.1911, found 486.1897. Anal. calcd. for  $C_{29}H_{27}NO_6$ : C, 71.74; H, 5.61; N, 2.88; Found: C, 71.39; H, 5.57; N, 2.81.

**REI 234:** MS (MALDI-TOF, without matrix):  $m/z = 592$   $[M]^+$ . HRMS (ESI):  $m/z$  calcd. for  $[C_{34}H_{40}NaO_9]^+$  615.2565, found 615.2588. Anal. calcd. for  $C_{34}H_{40}O_9$ : C, 68.90; H, 6.80; Found: C, 68.99; H, 6.97.

**REI 259:** MS (ESI):  $m/z = 705$   $[M+Na]^+$ , 1387  $[2M+Na]^+$ . HRMS (ESI):  $m/z$  calcd. for  $[C_{38}H_{42}FeNaO_8]^+$  705.2122, found 705.2128. Anal. calcd. for  $C_{38}H_{42}FeO_8$ : C, 66.86; H, 6.20; Found: C, 66.86; H, 6.07; N, 0.08.

**HH 3:** MS (ESI):  $m/z = 434$   $[M]$ . Anal. calcd. for:  $[C_{24}H_{26}FeO_4]$ : C, 66.37; H, 6.03. Found: C, 66.70; H, 6.23.

**VK 3:** MS (ESI):  $m/z = 809$   $[M+Na]^+$ . HRMS (ESI):  $m/z$  calcd. for  $[C_{43}H_{54}FeO_{10}Na]^+$ : 809.29536, found: 809.29594. Anal. calcd. for  $C_{43}H_{54}FeO_{10}$ : C, 65.65; H, 6.92, Found: C, 65.62.17; H, 7.18.

<sup>1</sup>H-NMR spectrum of hybrid **TF19** recorded on a Bruker Avance spectrometer (300 MHz, CDCl<sub>3</sub>):

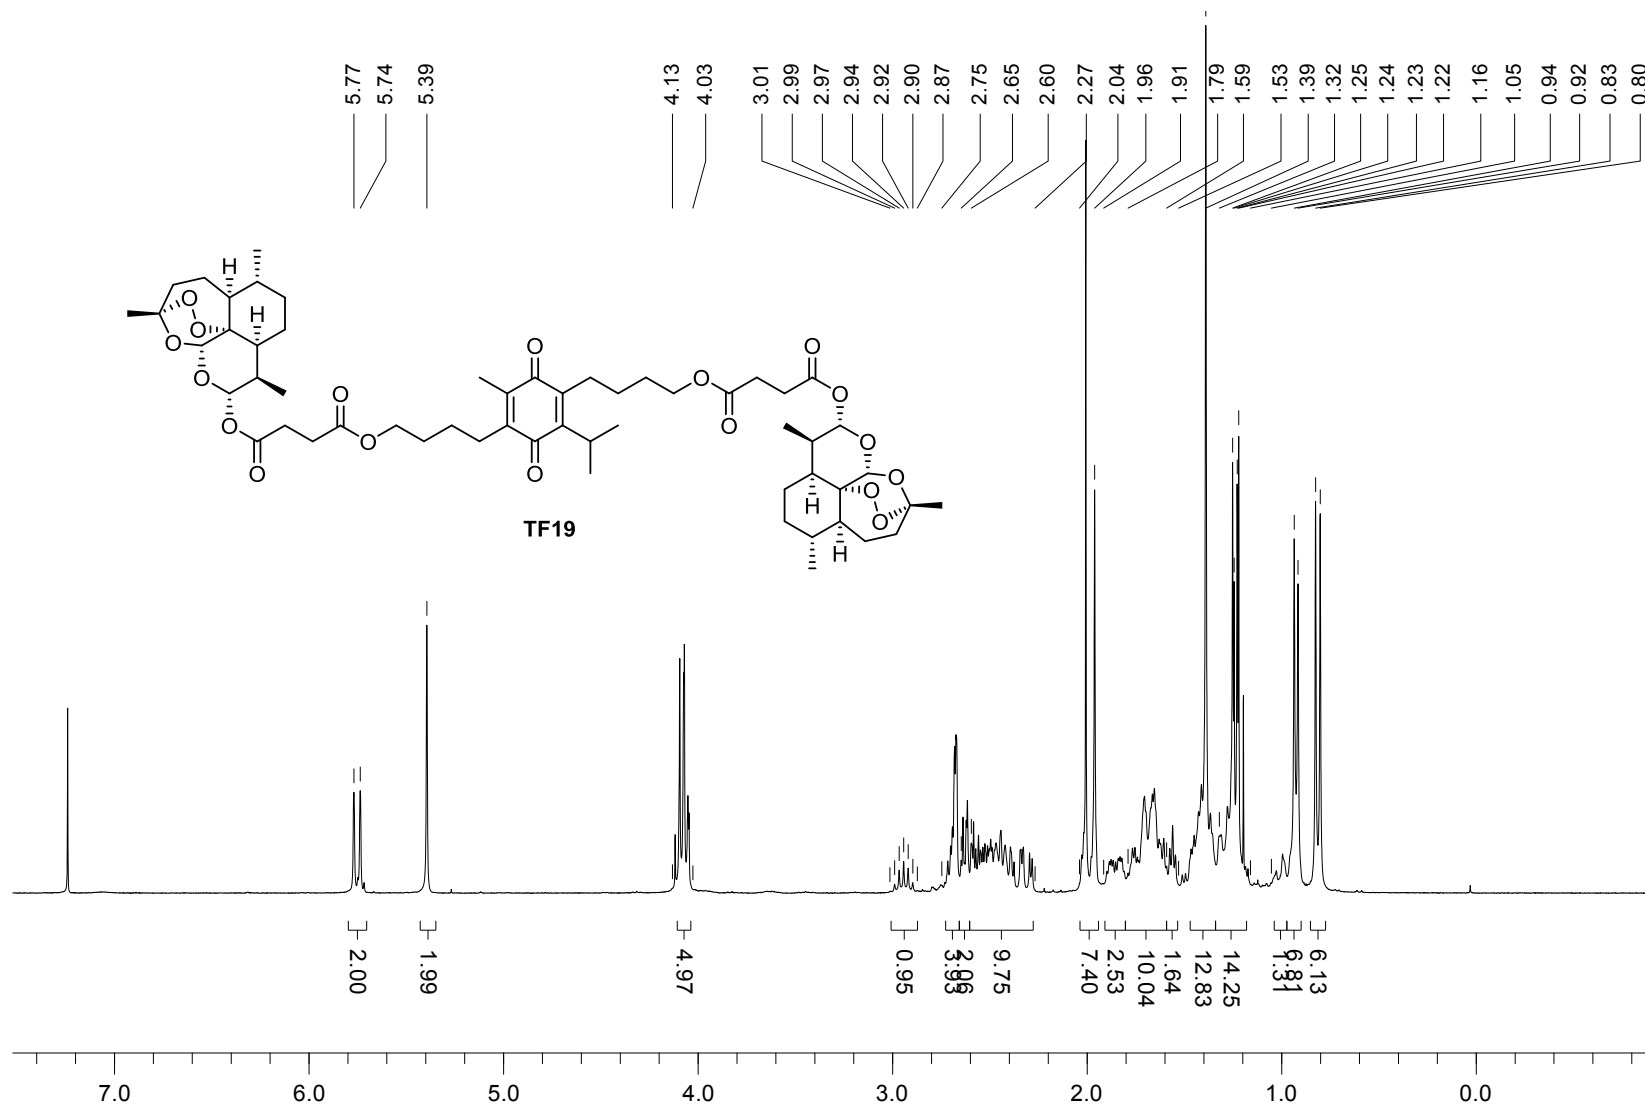

<sup>13</sup>C-NMR spectrum of hybrid **TF19** recorded on a Bruker Avance spectrometer (75 MHz, CDCl<sub>3</sub>):

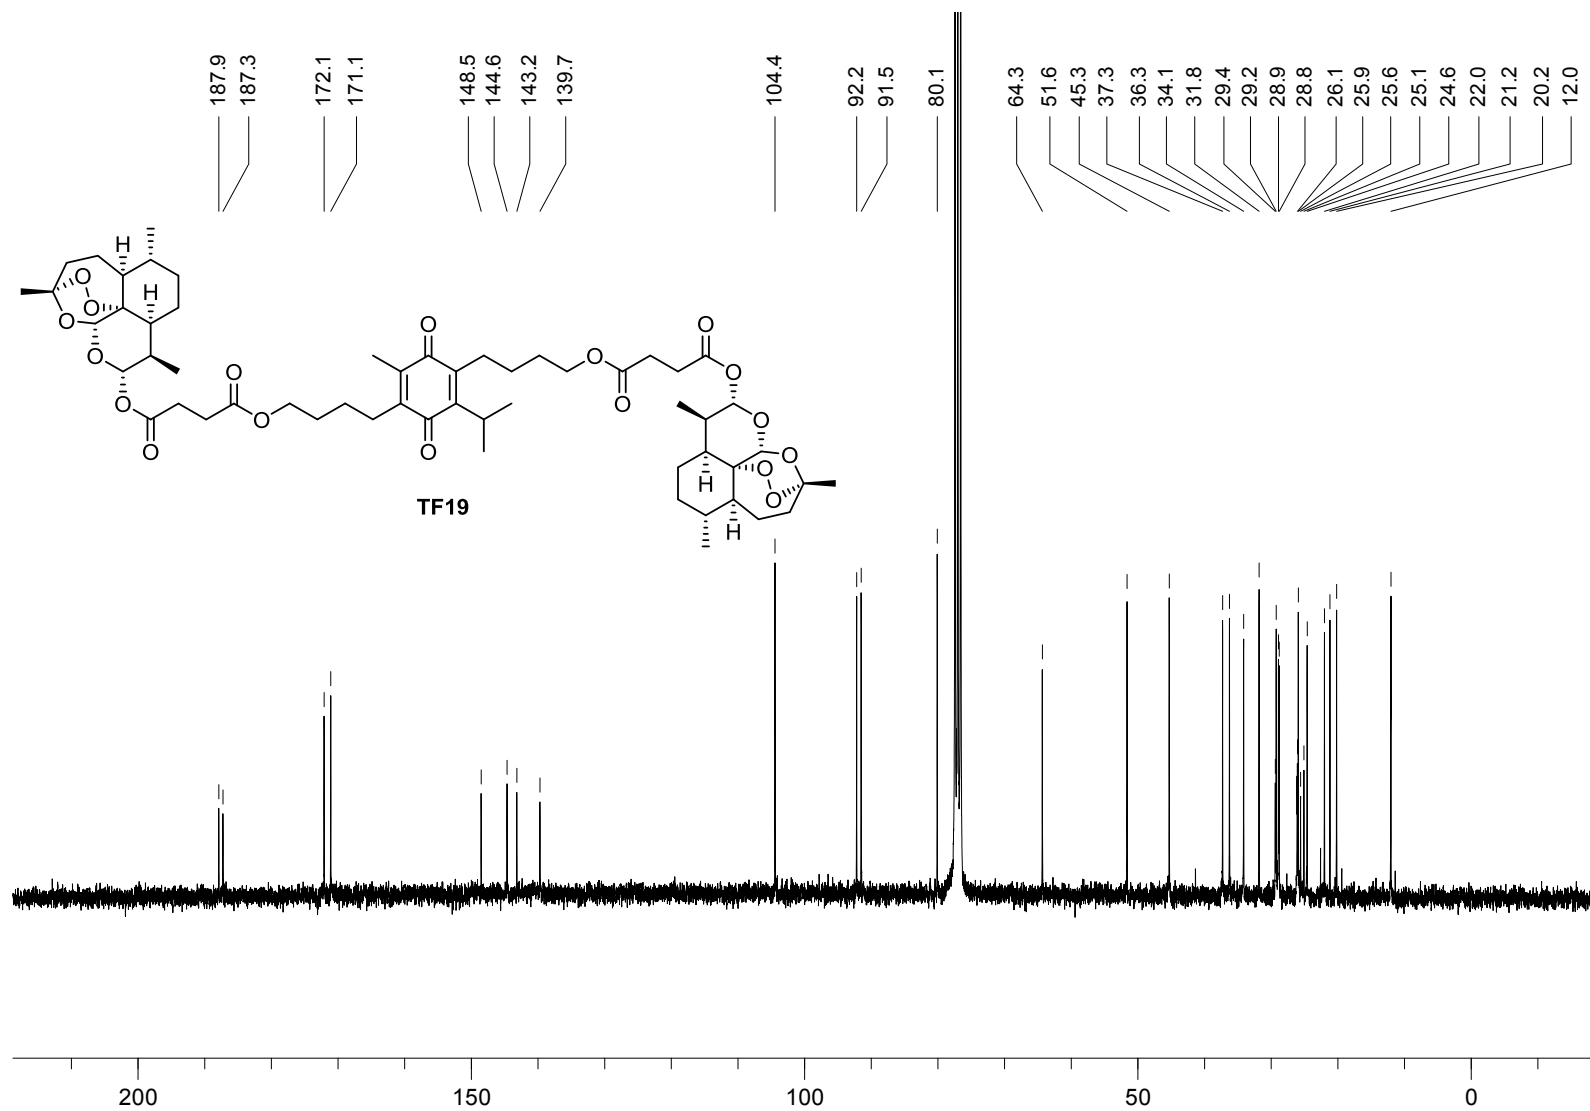

<sup>1</sup>H-NMR spectrum of hybrid **TF26** recorded on a Bruker Avance spectrometer (300 MHz, CDCl<sub>3</sub>):

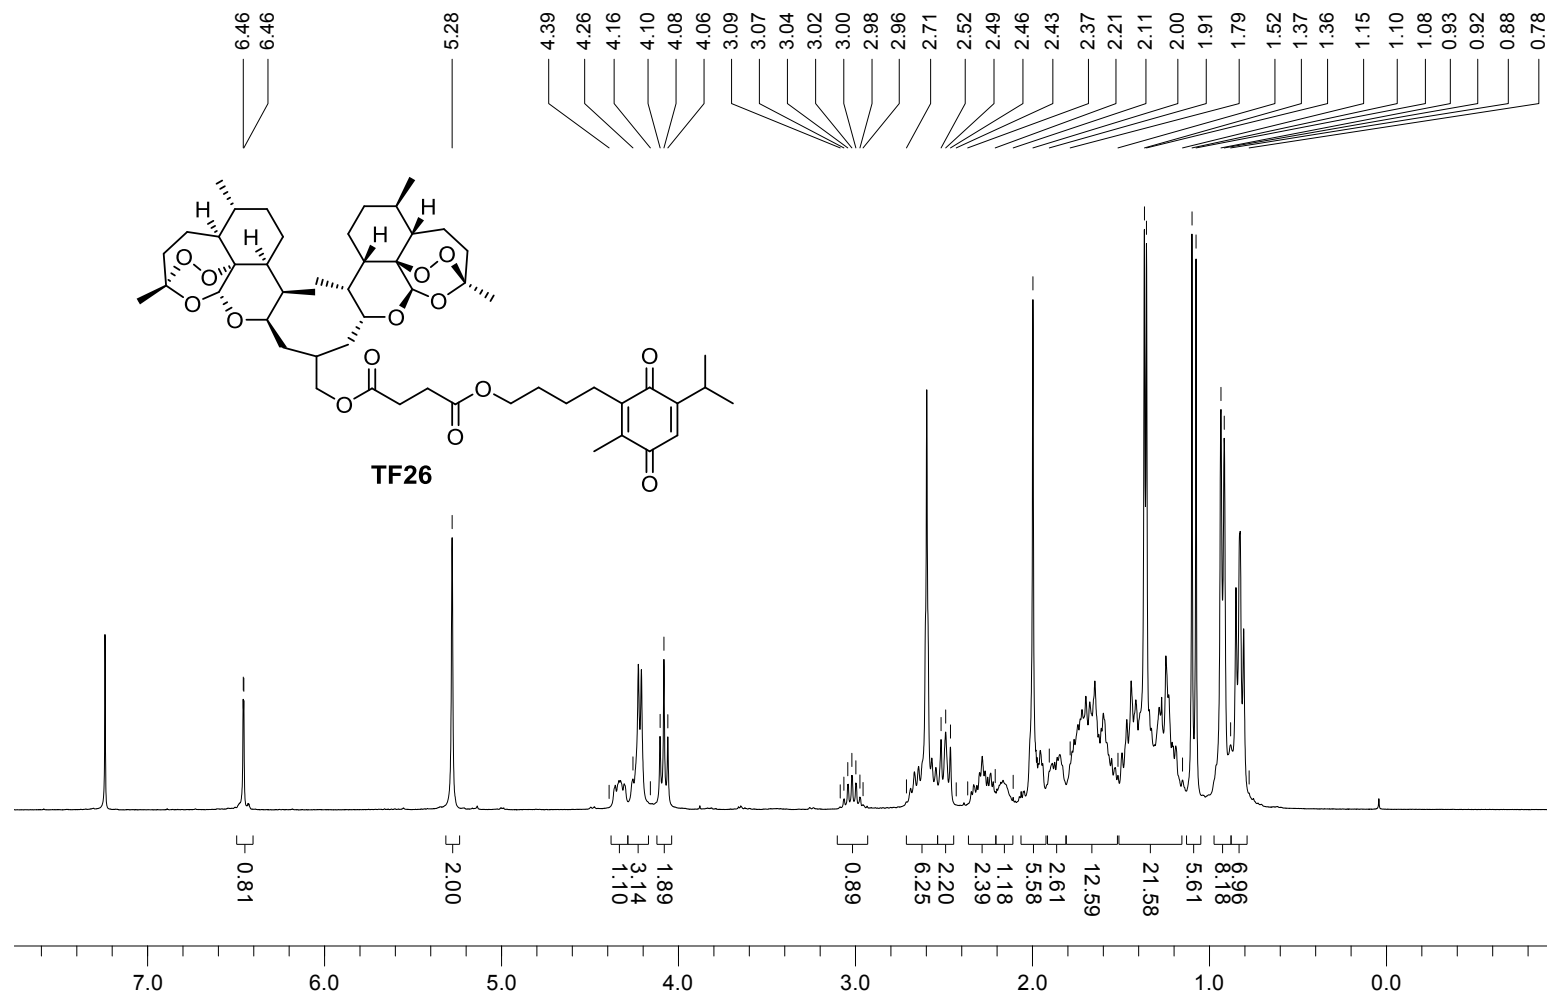

$^{13}\text{C}$ -NMR spectrum of hybrid **TF26** recorded on a Bruker Avance spectrometer (75 MHz,  $\text{CDCl}_3$ ):

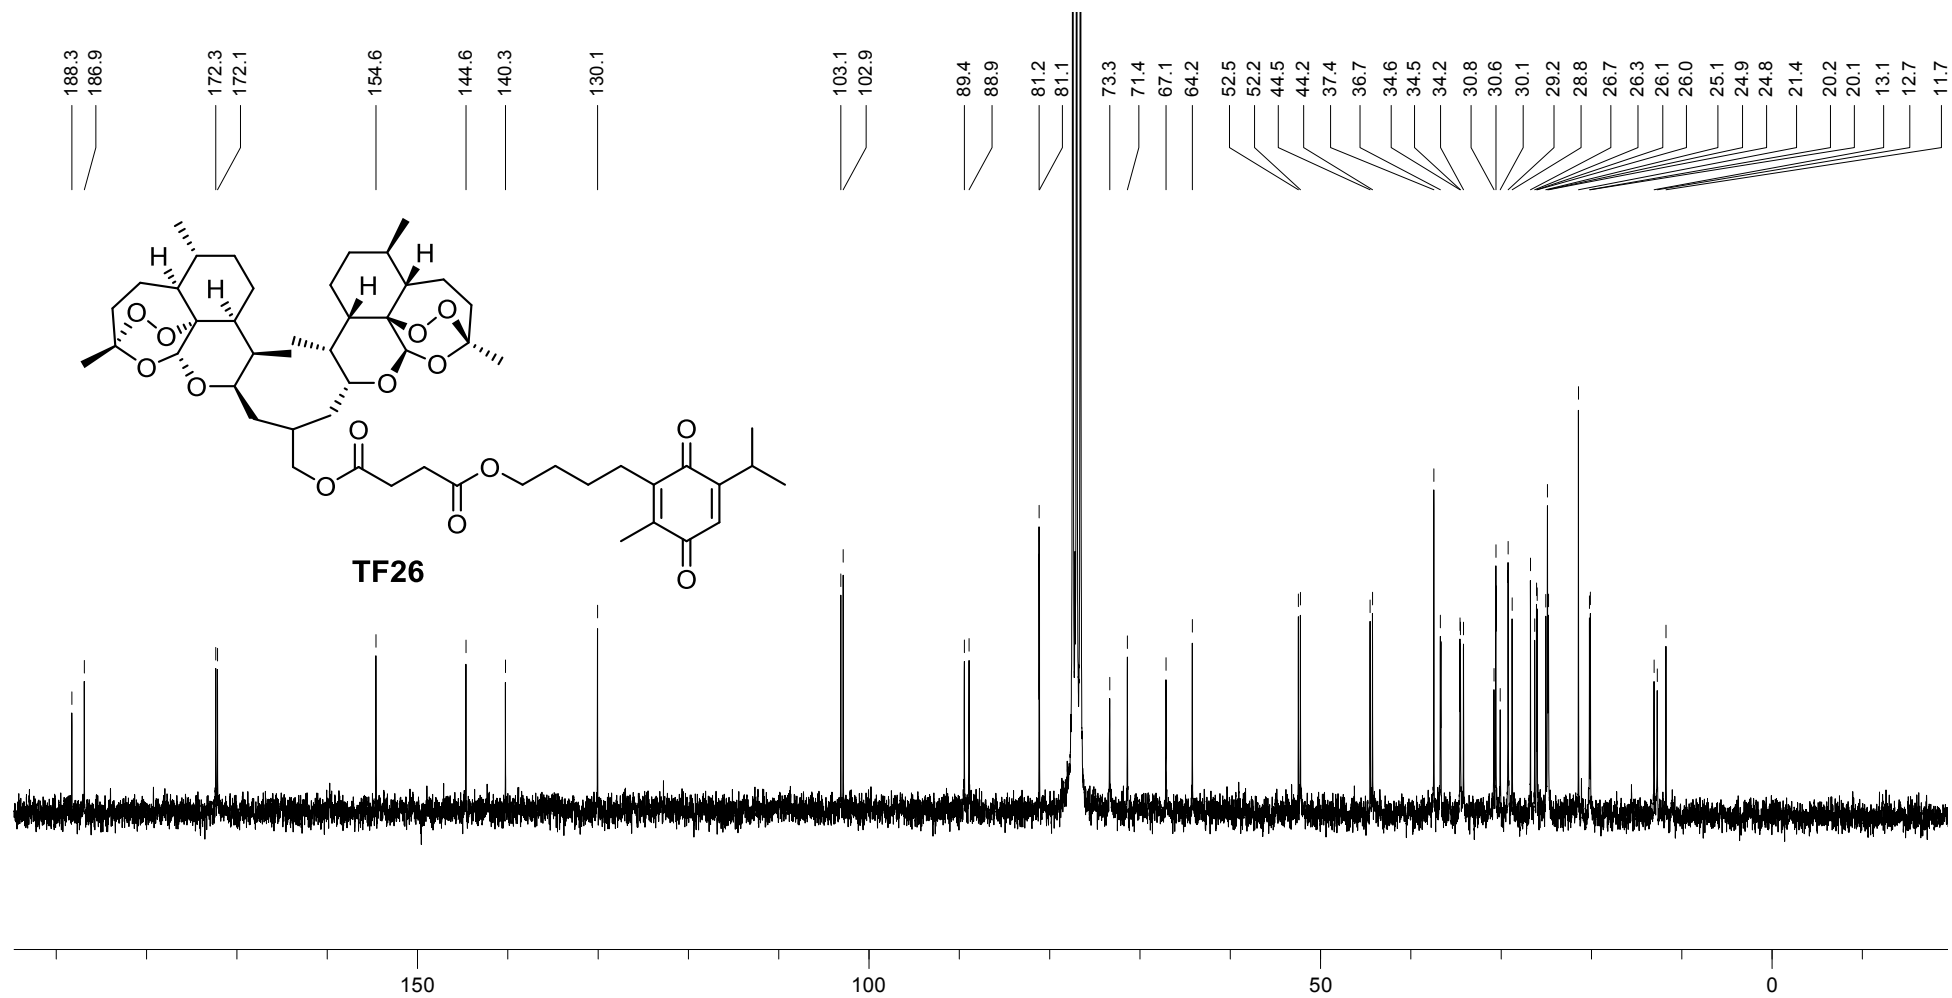

$^1\text{H-NMR}$  spectrum of hybrid **REI 213** recorded on a Bruker Avance spectrometer (300 MHz,  $\text{CDCl}_3$ ):

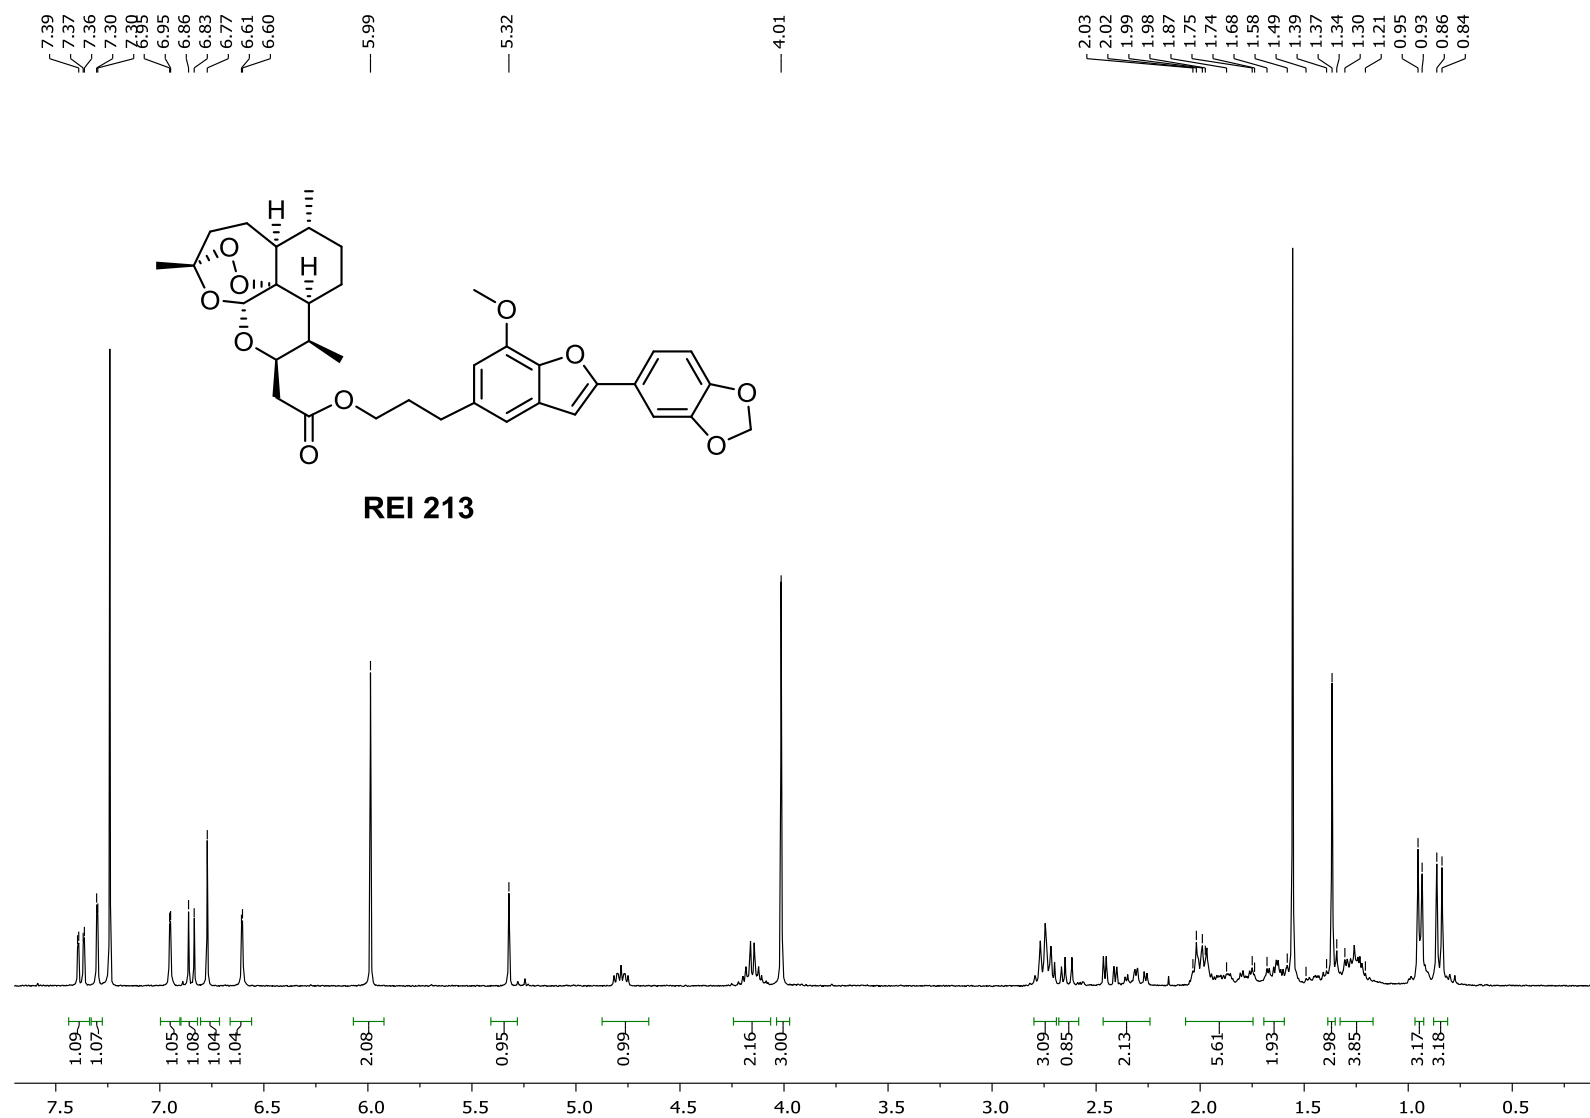



$^{13}\text{C}$ -NMR spectrum of hybrid **REI 213** recorded on a Bruker Avance spectrometer (75 MHz,  $\text{CDCl}_3$ ):

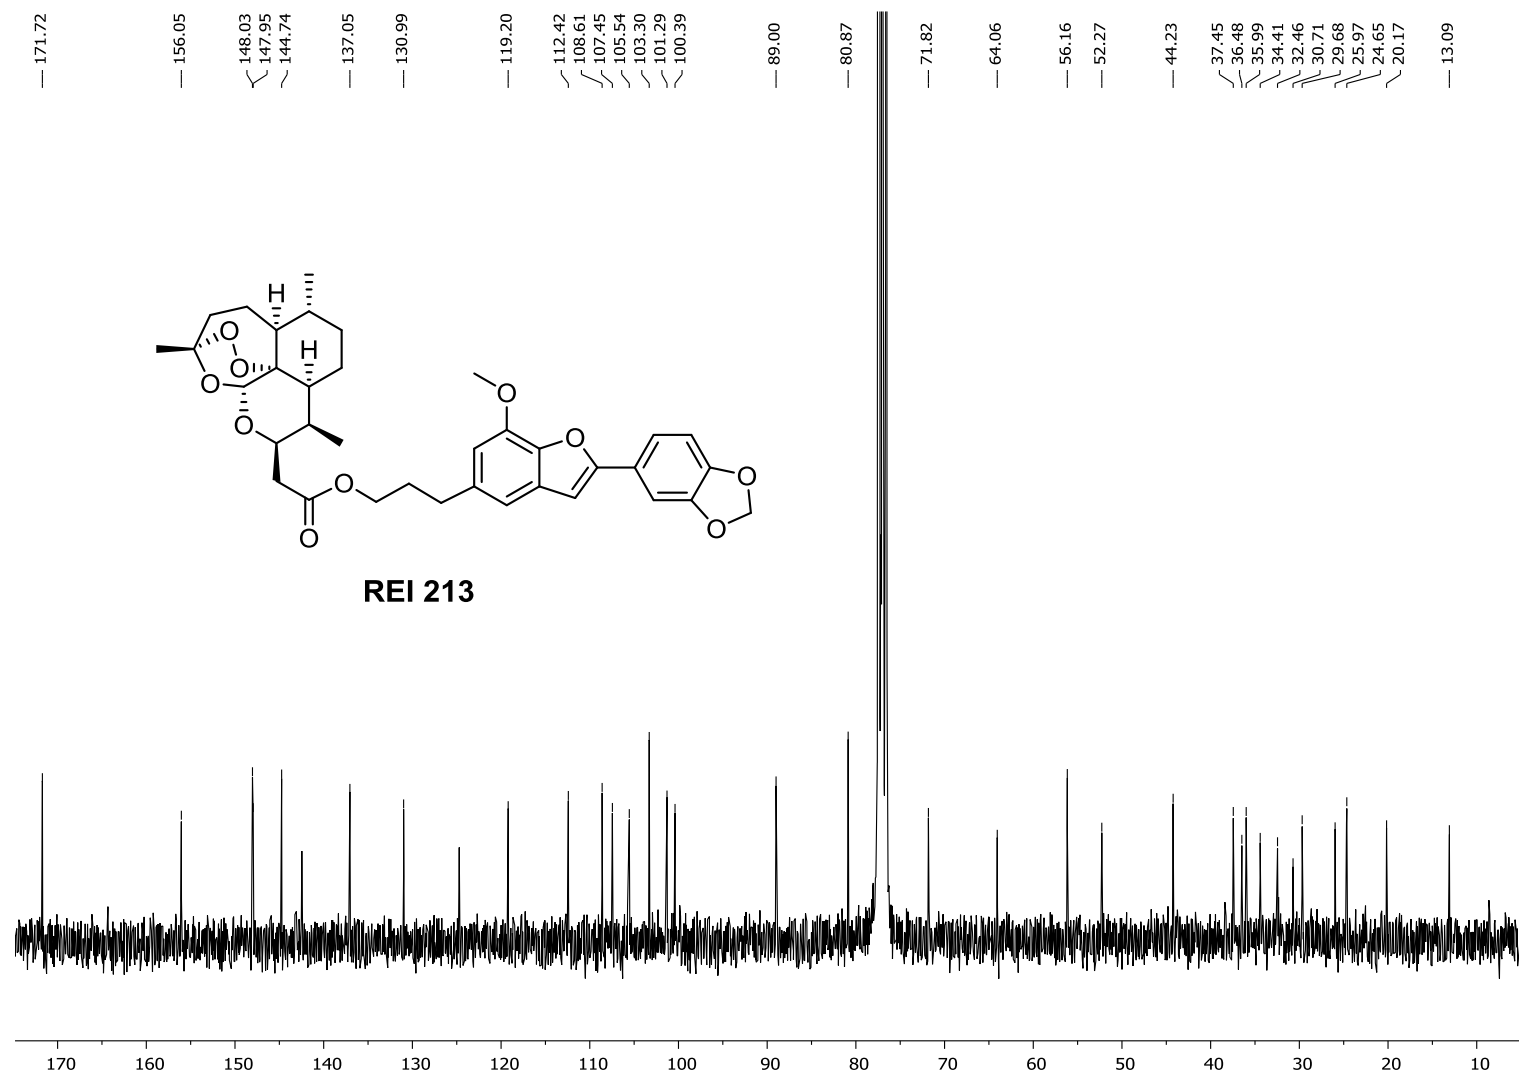

<sup>1</sup>H-NMR spectrum of hybrid **REI 220+216** recorded on a Bruker Avance spectrometer (300 MHz, CDCl<sub>3</sub>):

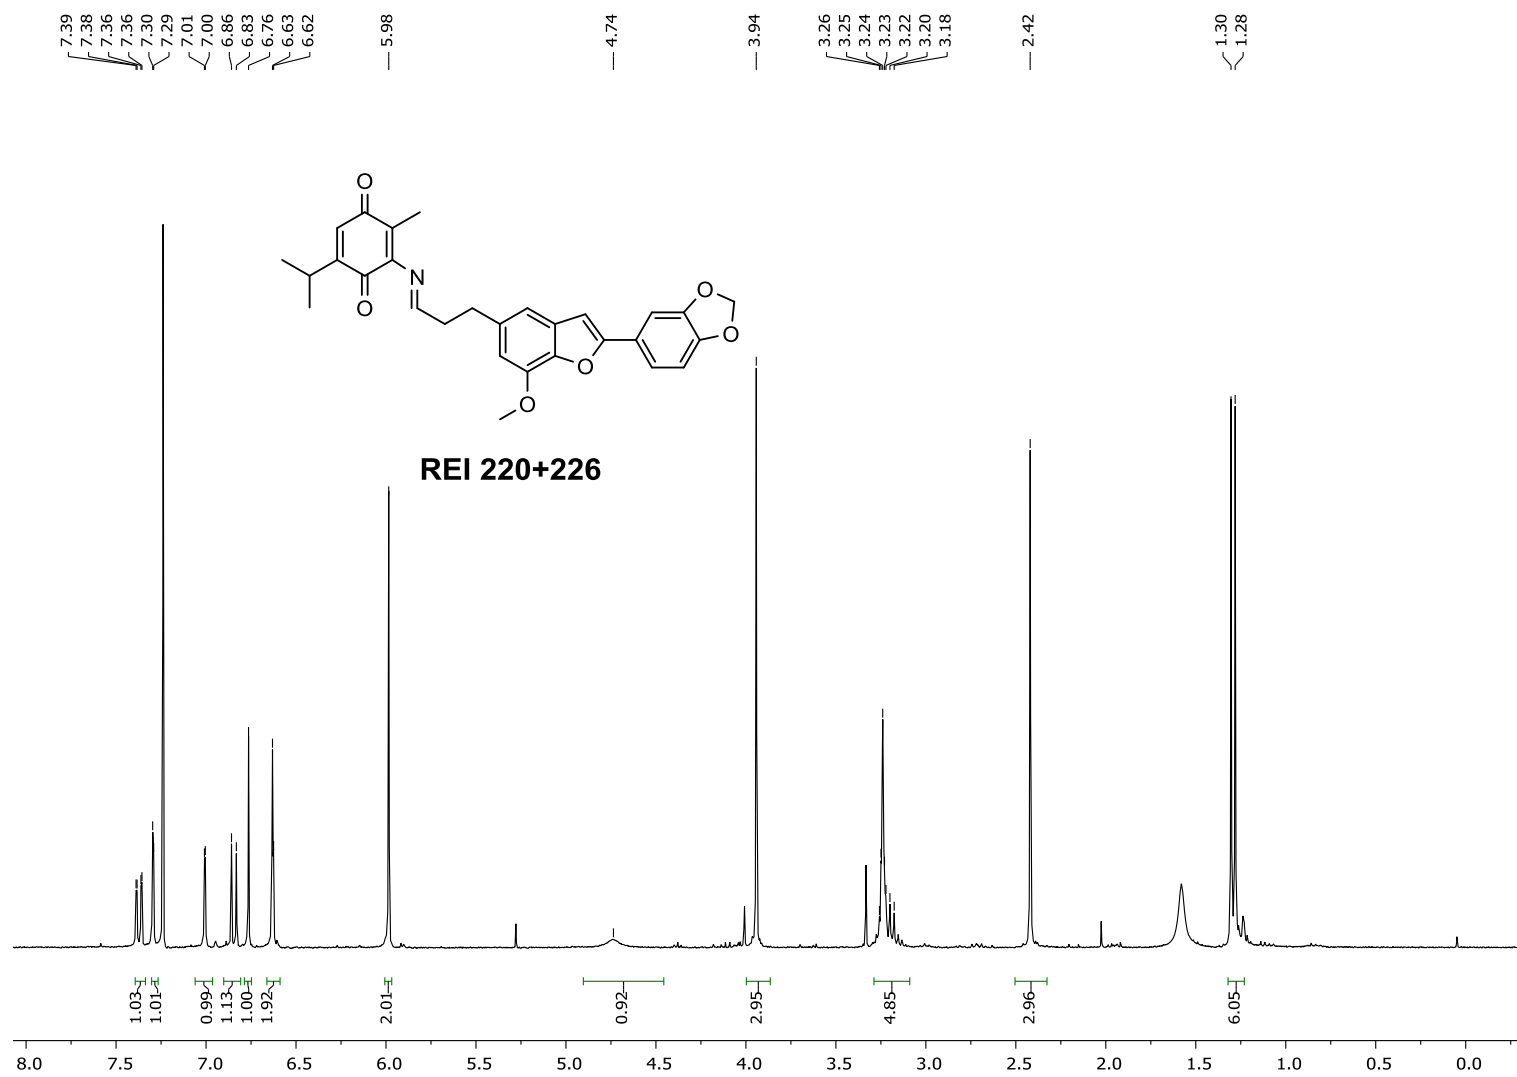

$^{13}\text{C}$ -NMR spectrum of hybrid **REI 220+216** recorded on a Bruker Avance spectrometer (75 MHz,  $\text{CDCl}_3$ ):

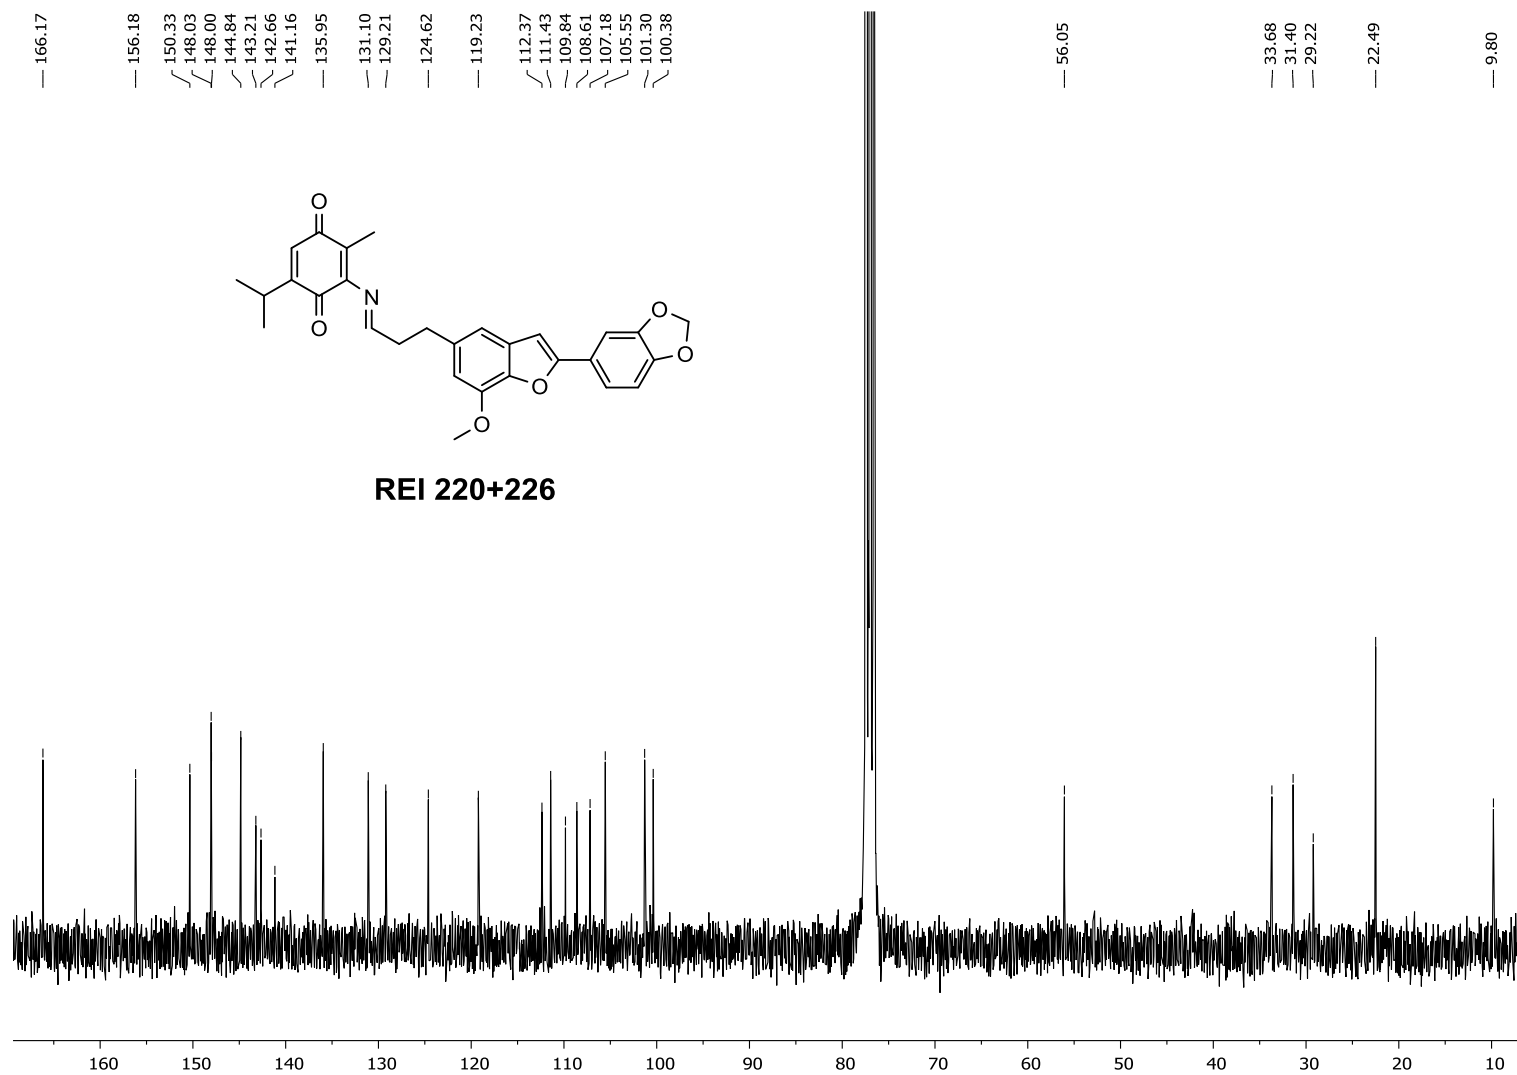

<sup>1</sup>H-NMR spectrum of hybrid **REI 234** recorded on a Bruker Avance spectrometer (300 MHz, CDCl<sub>3</sub>):

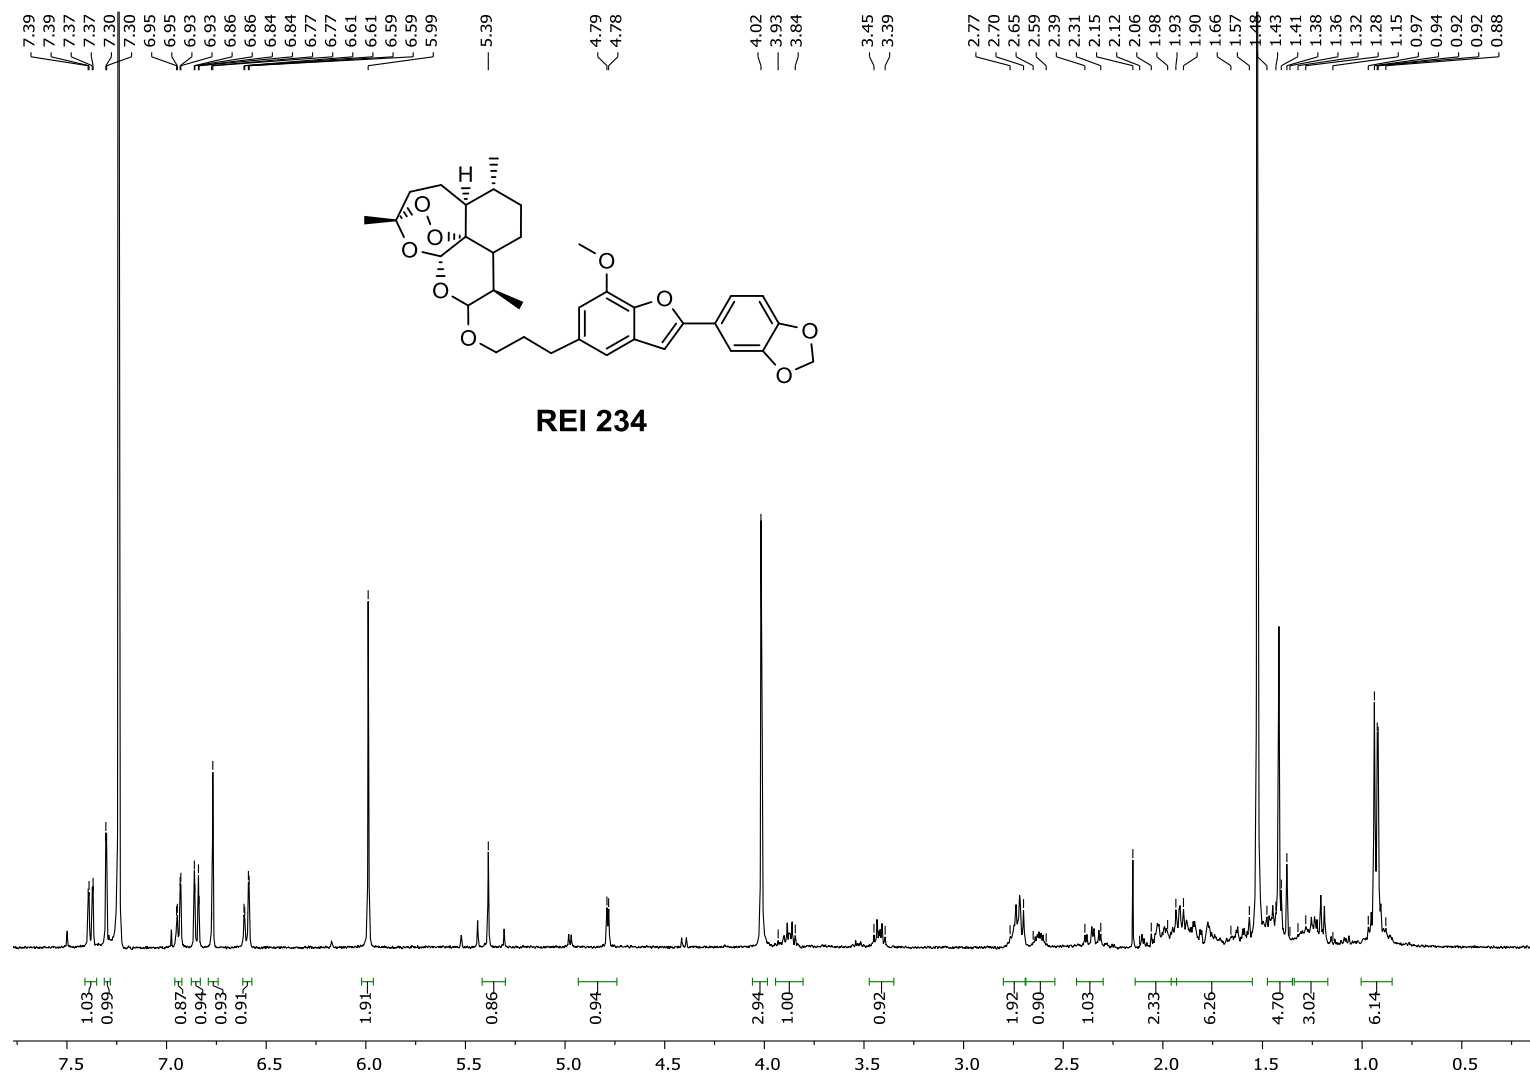

$^{13}\text{C}$ -NMR spectrum of hybrid **REI 234** recorded on a JEOL JNM GX 400 spectrometer (100 MHz,  $\text{CDCl}_3$ ):

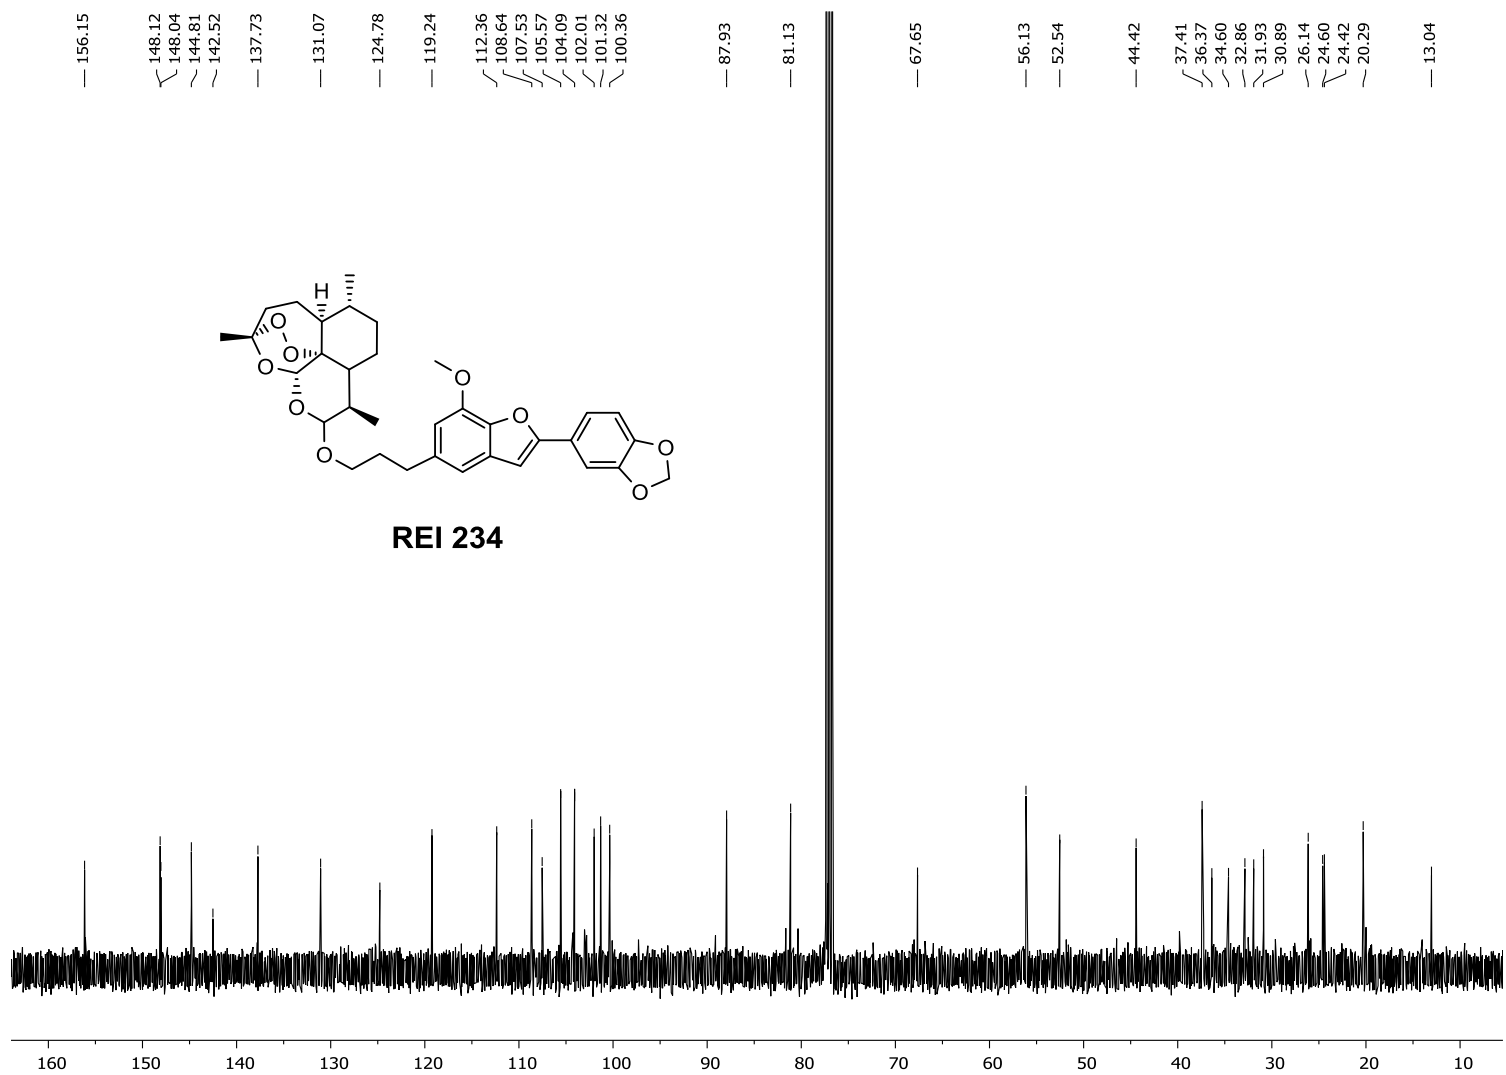

$^1\text{H-NMR}$  spectrum of hybrid **REI 259** recorded on a JEOL JNM GX 400 spectrometer (400 MHz, Acetone- $d_6$ ):

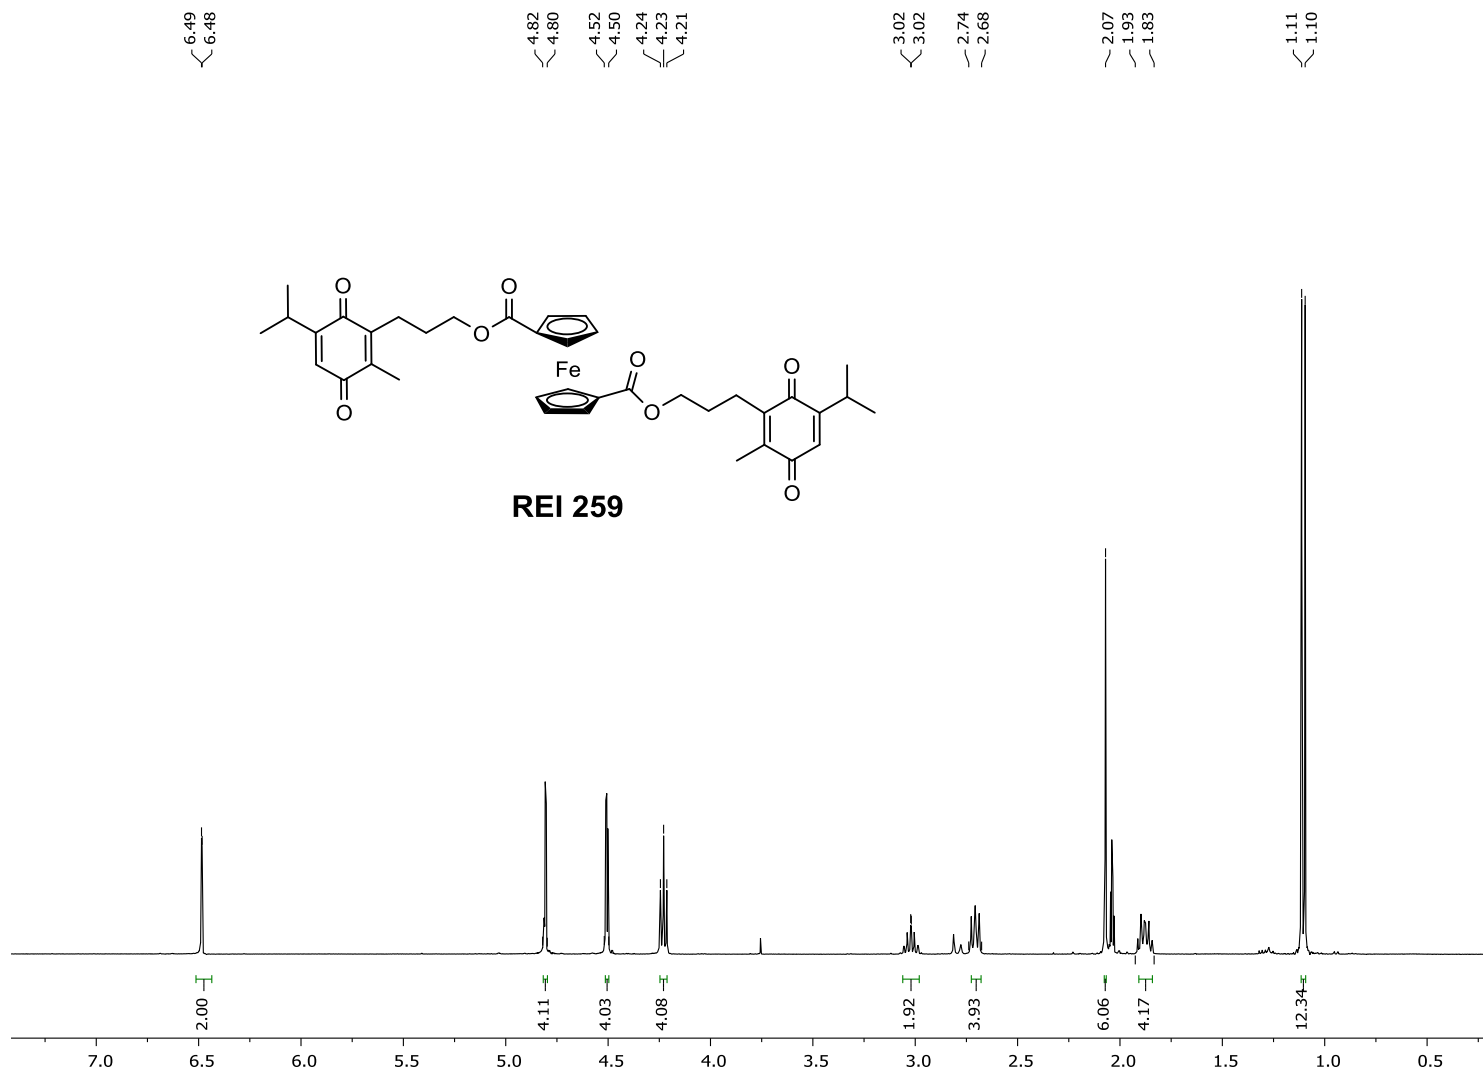

$^{13}\text{C}$ -NMR spectrum of hybrid **REI 259** recorded on a JEOL JNM GX 400 spectrometer (100 MHz, Acetone- $d_6$ ):

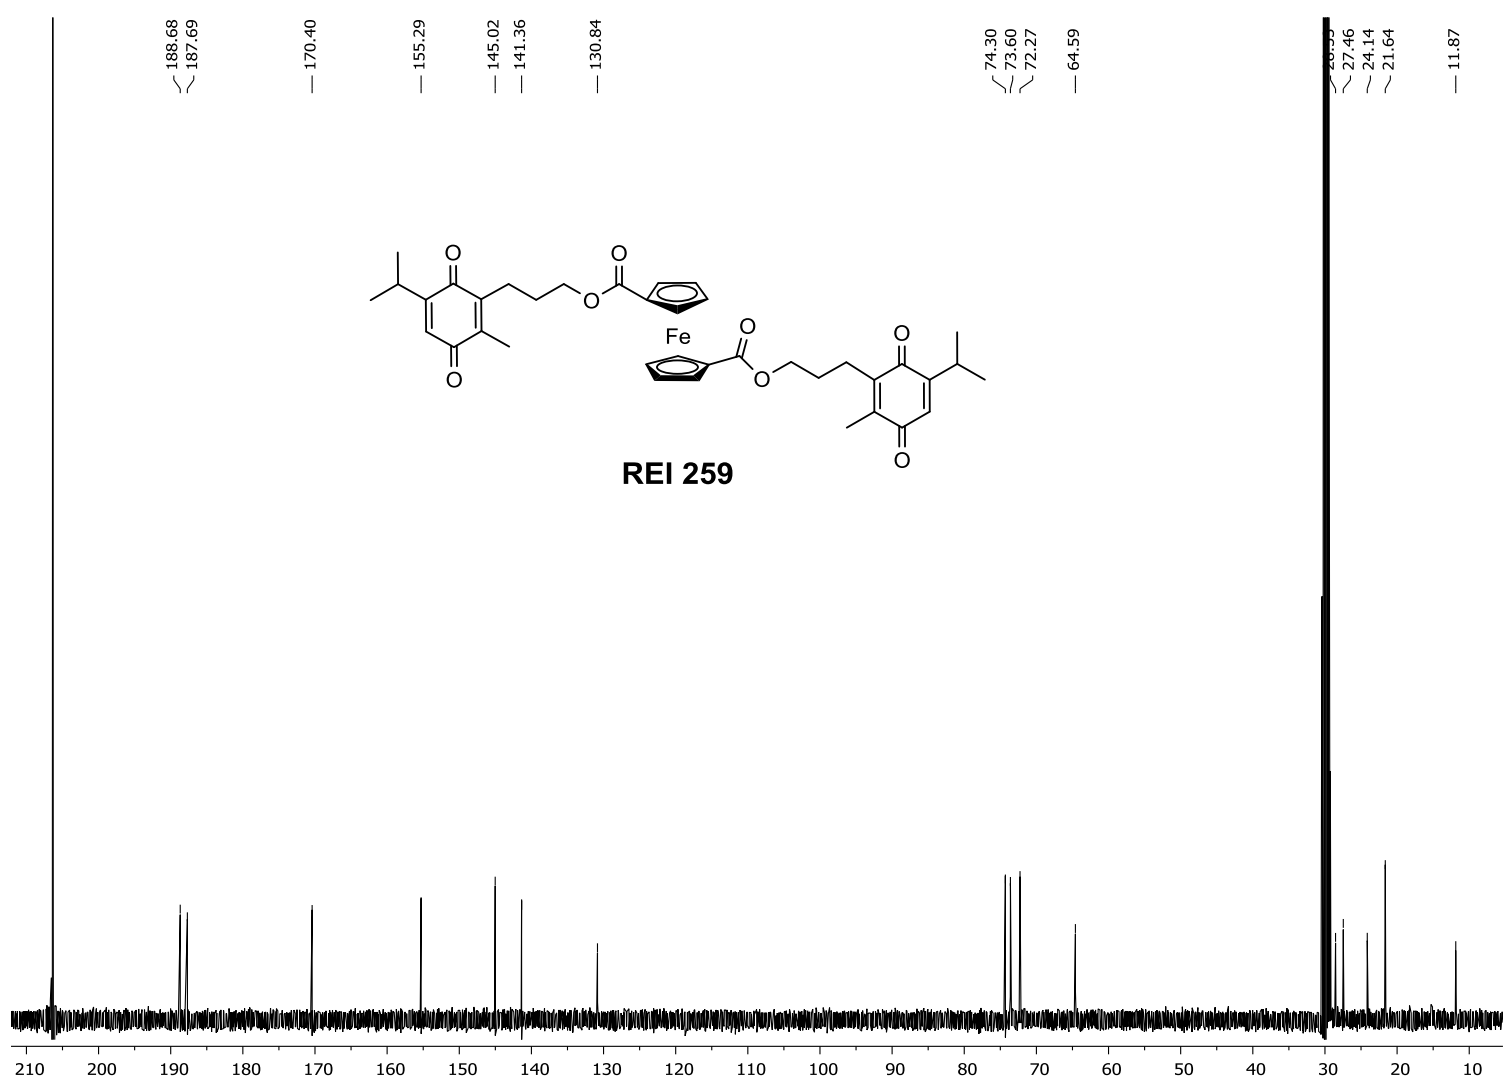

$^1\text{H}$ -NMR spectrum of hybrid **HH3** recorded on a Bruker Avance spectrometer (300 MHz, Acetone- $d_6$ ):

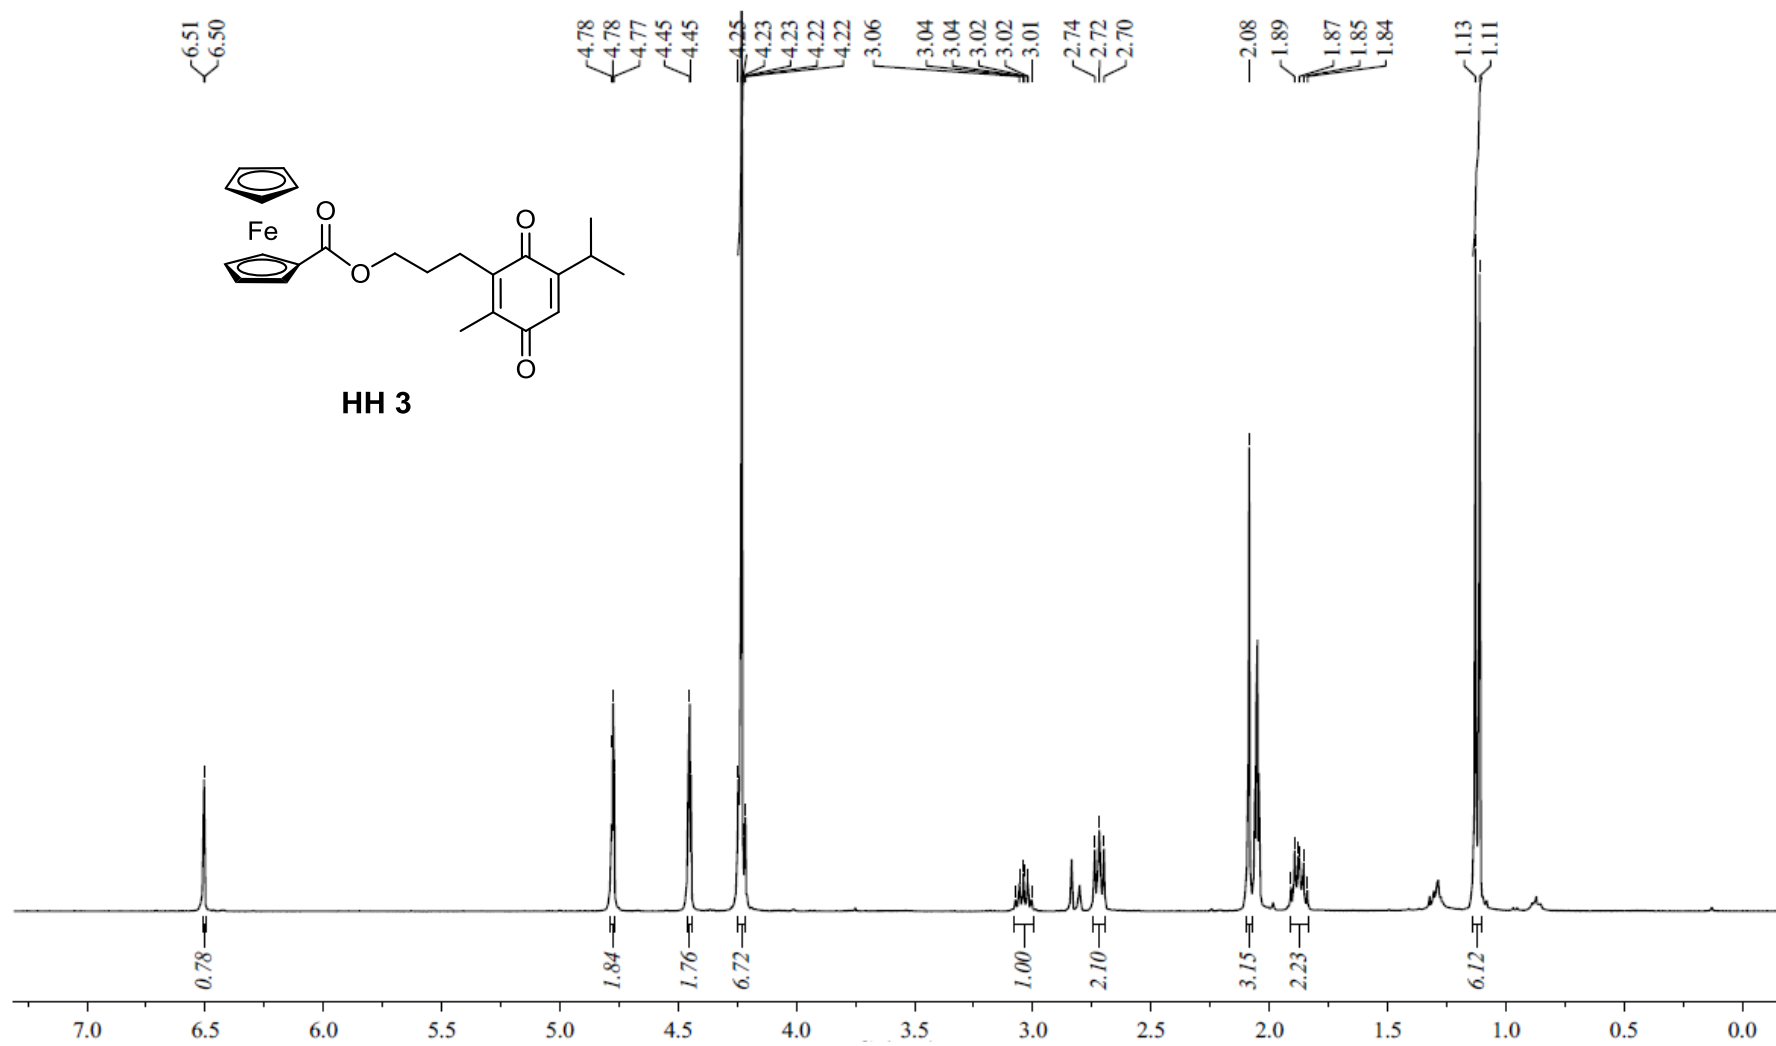



$^{13}\text{C}$ -NMR spectrum of hybrid **HH3** recorded on a Bruker Avance spectrometer (75 MHz, Acetone- $d_6$ ):

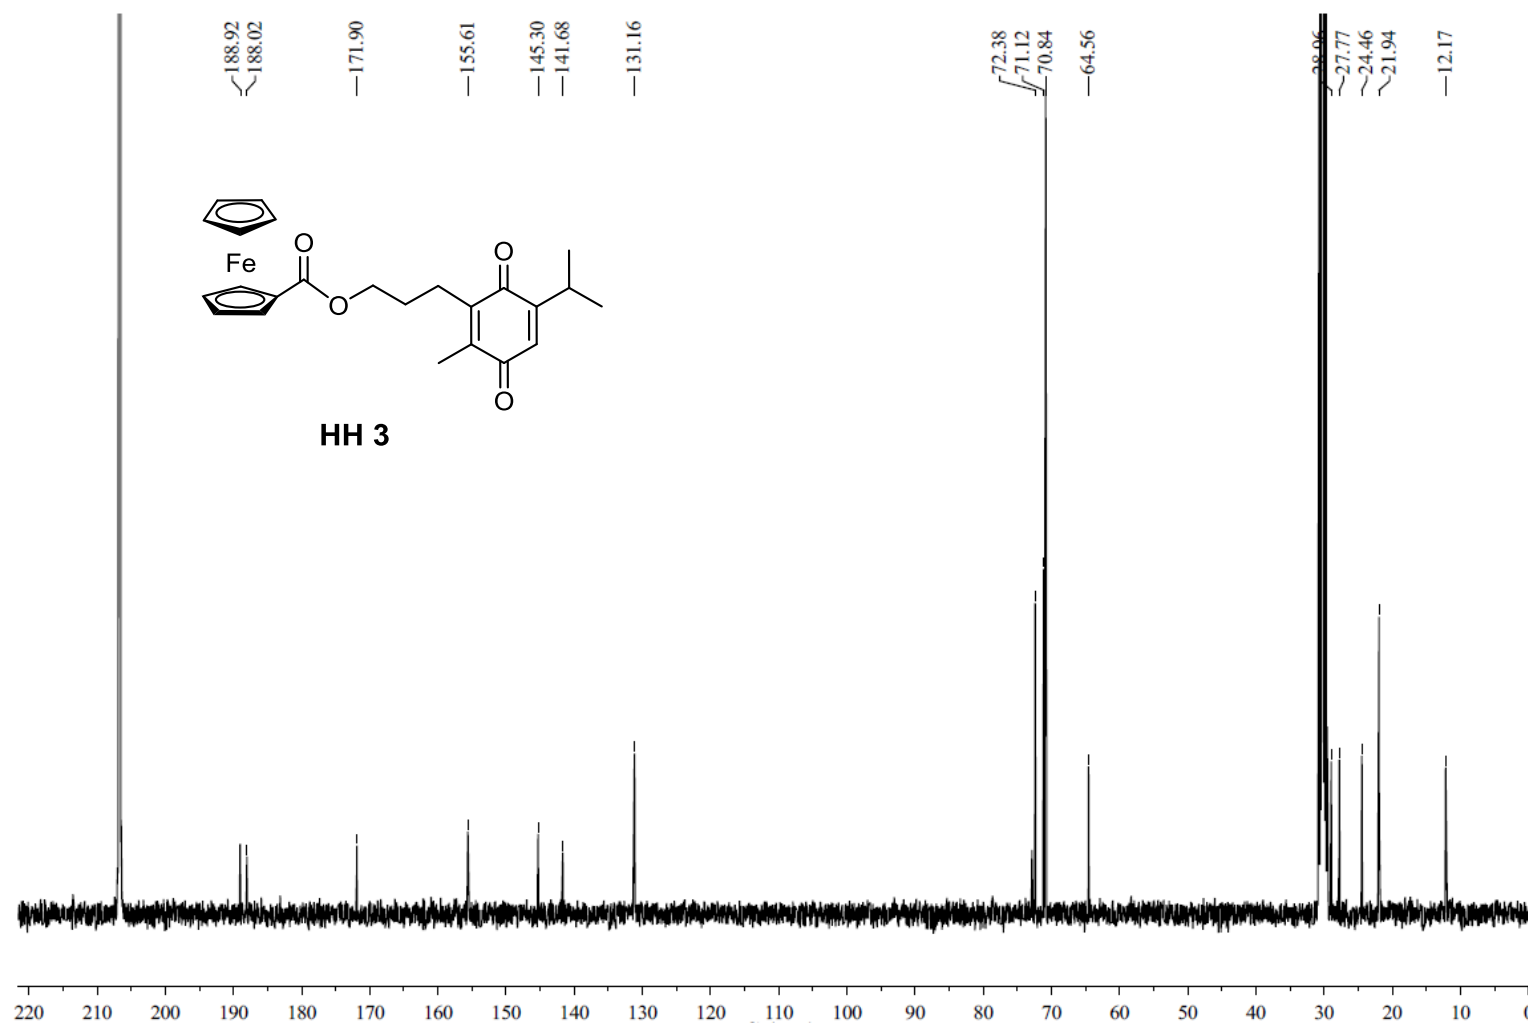

<sup>1</sup>H-NMR spectrum of hybrid **VK3** recorded on a JEOL JNM GX 400 spectrometer (400 MHz, Acetone-d<sub>6</sub>):

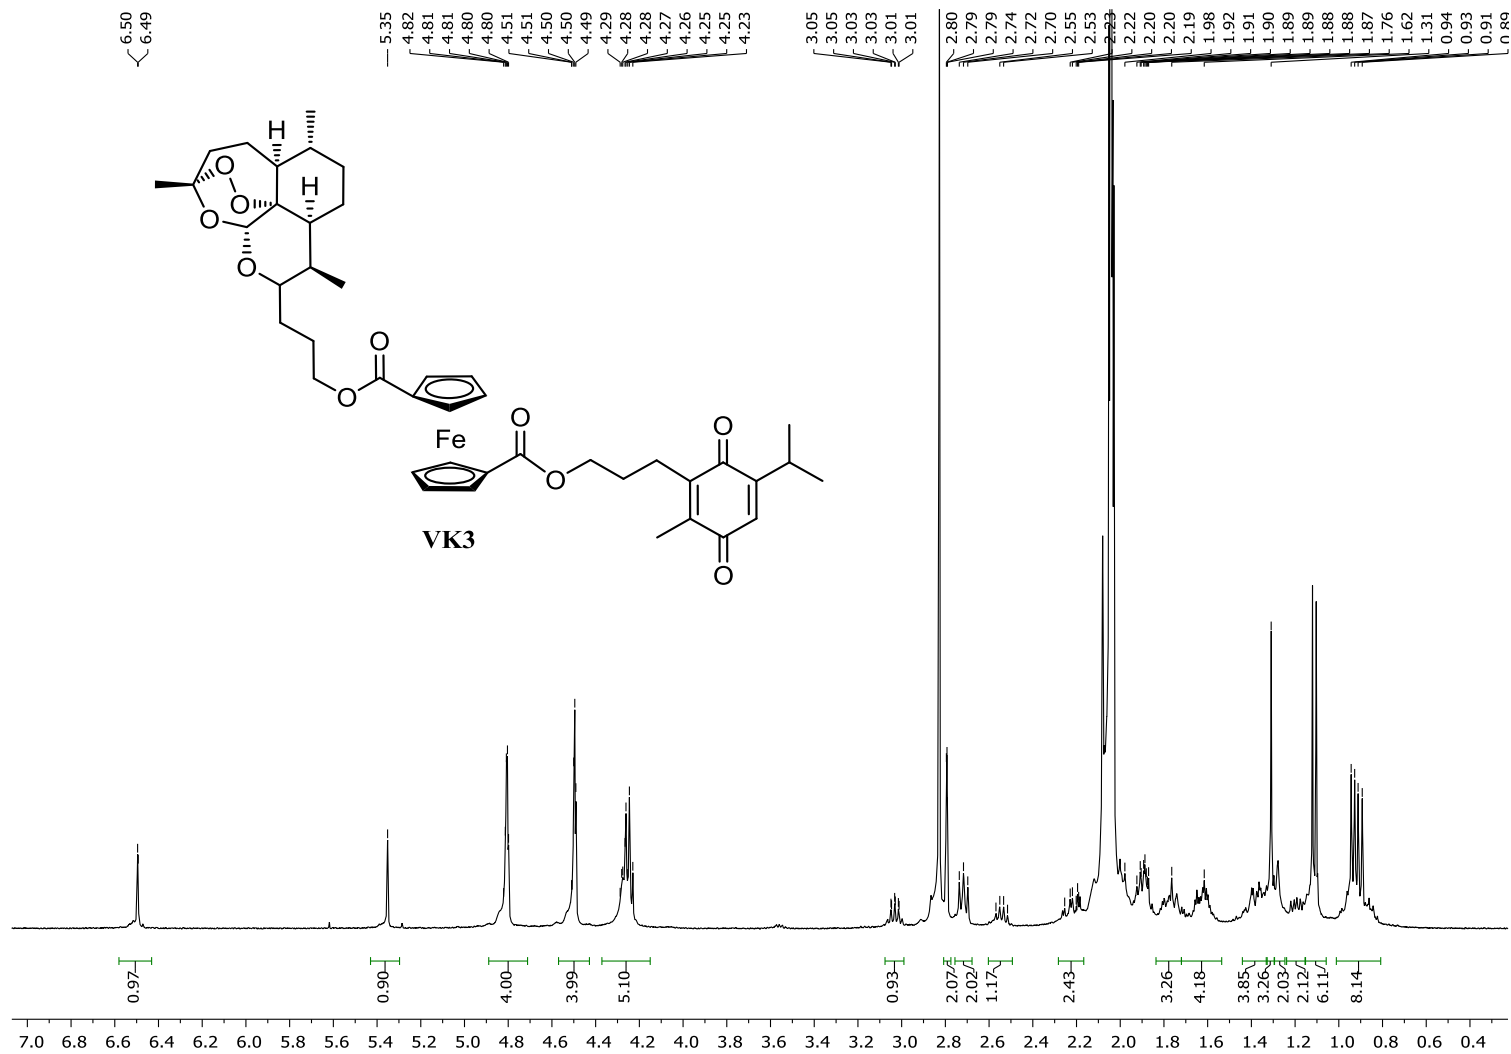

$^{13}\text{C}$ -NMR spectrum of hybrid **VK3** recorded on a JEOL JNM GX 400 spectrometer (100 MHz, Acetone- $\text{d}_6$ ):

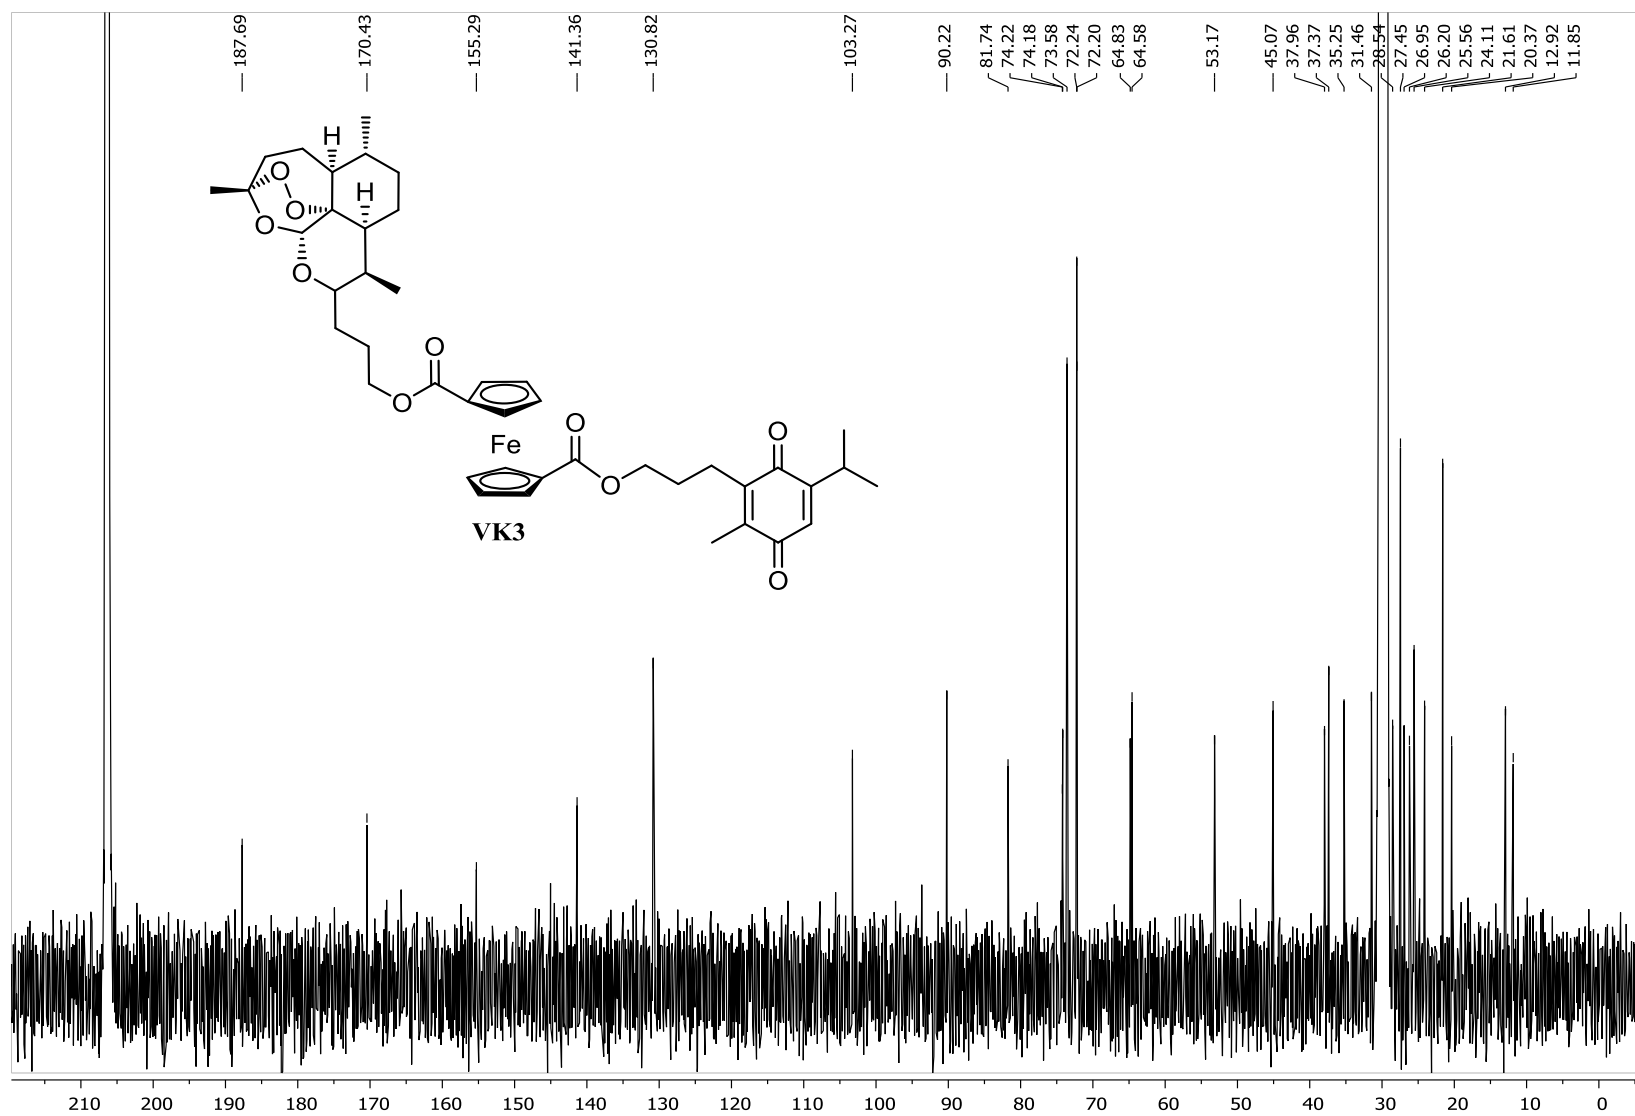

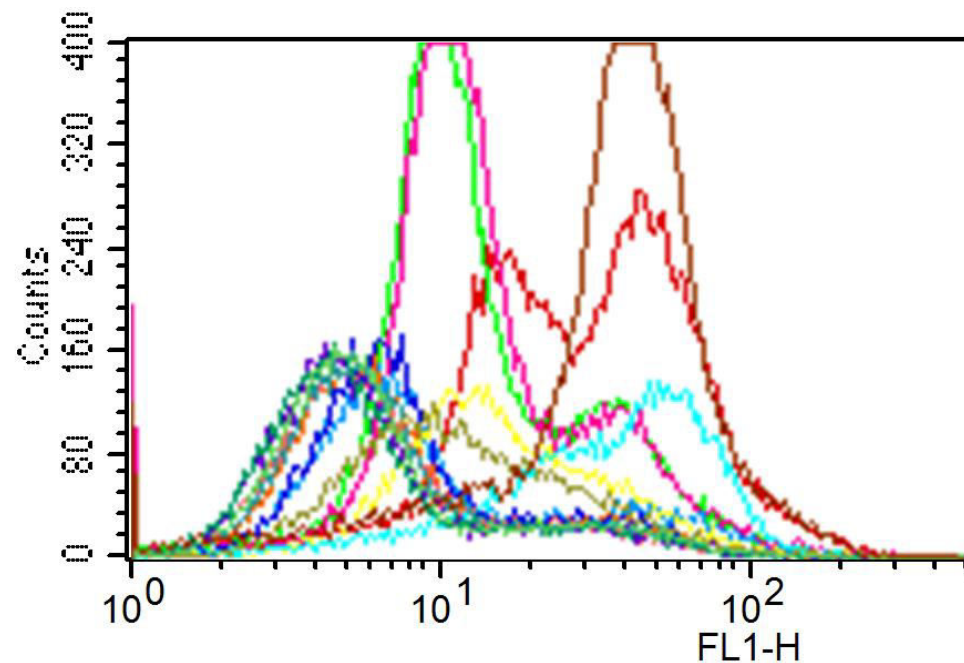

| Purple      | Doxorubicin alone |
|-------------|-------------------|
| Dark green  | DOX + TF26        |
| Orange      | DOX + REI213      |
| Light blue  | DOX + REI220+26   |
| Rosy        | DOX + VK3         |
| Dark blue   | DOX + TF27        |
| Grey        | DOX + REI230      |
| Middle blue | DOX + HH3         |
| Dark brown  | DOX + REI234      |
| Pink        | DOX + DHA         |
| Light green | DOX + TF29        |
| Yellow      | DOX + TF19        |
| Cyan blue   | DOX + REI259      |
| Red         | DOX + REI235      |
| Brown       | DOX + Verapamil   |

**Figure S2:** Representative flow cytometric histograms of doxorubicin uptake in CEM/ADR5000 cells. Cells were incubated for 24 h with doxorubicin alone (purple curve on the left), doxorubicin (DOX) plus ART derivatives (from left to right: TF26, REI213, REI220+26, VK3, TF27, REI230, HH3, REI234, DHA, TF29, TF19, REI259, REI235), or doxorubicin plus verapamil (brown curve on the right). Shown are the fluorescence intensities (x-axis) and cell counts (y-axis).
